# Supplementary material for: Polyanhydride nanovaccine against H3N2 influenza A virus generates mucosal resident and systemic immunity promoting protection
Source: PubMed Central journal article supplement (PMC11143372; doi:10.1038/s41541-024-00883-3), 2024-05-31
Supplement: 41541_2024_883_MOESM1_ESM.pdf [file 41541_2024_883_MOESM1_ESM.pdf]

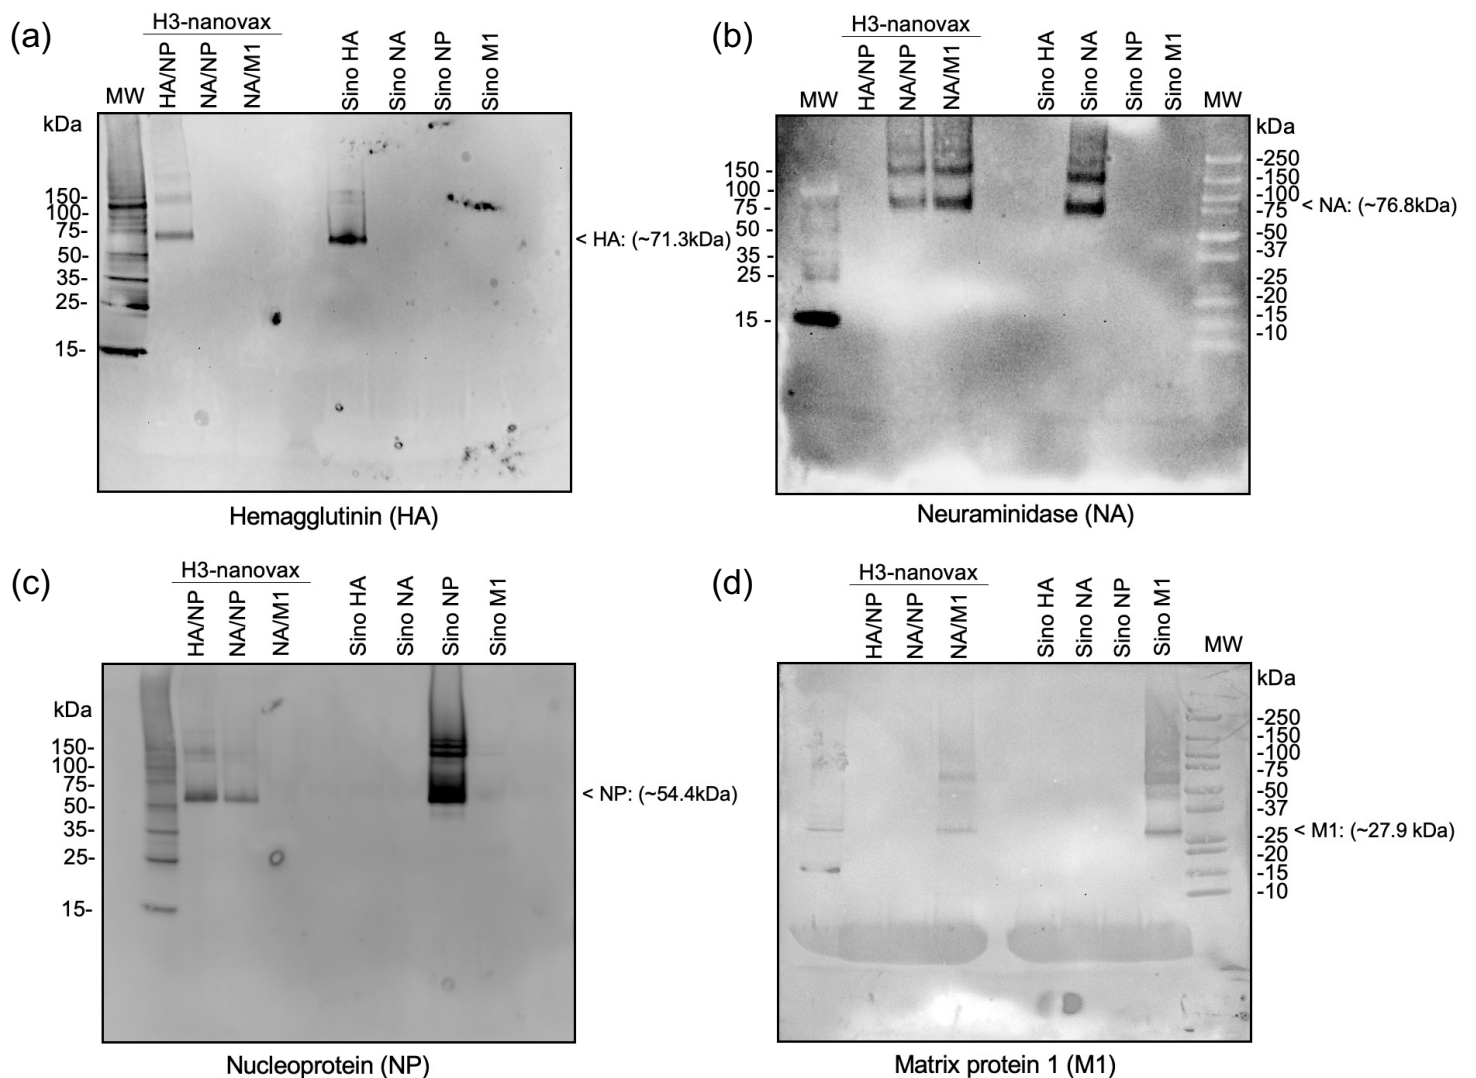

**Supplementary Fig. 1. The IAV proteins released from H3-nanovax formulations remain structurally intact.** Proteins liberated from the three H3-nanovax formulations and the input purified HA, NA, NP, or M1 proteins (Sino) were examined by SDS PAGE under reducing conditions. Gels were transferred onto a PVDF membrane, membranes blocked in 5% milk for 1 hr, washed, and incubated with primary antibody against their indicated protein overnight at 4°C. Membranes were then washed and incubated with goat anti-rabbit horseradish peroxidase (HRP) as well as ECL DualVue™ Western Blotting Marker S-Protein-HRP to reveal molecular weight markers for 1-2 hrs, washed, and then revealed with an ECL substrate for 5-10 min. Images were obtained on a ChemiDoc MP Imager (Bio-Rad Laboratories). SDS-Page gels against hemagglutinin (HA: antibody 86001-RM01) (a), neuraminidase (NA: antibody 40040-MM02) (b), nucleoprotein (NP: antibody MA5-42364) (c), and matrix protein 1 (M1: antibody PA5-32253) (d). The predicted MW: Molecular weight kDa (kilodaltons) is indicated.

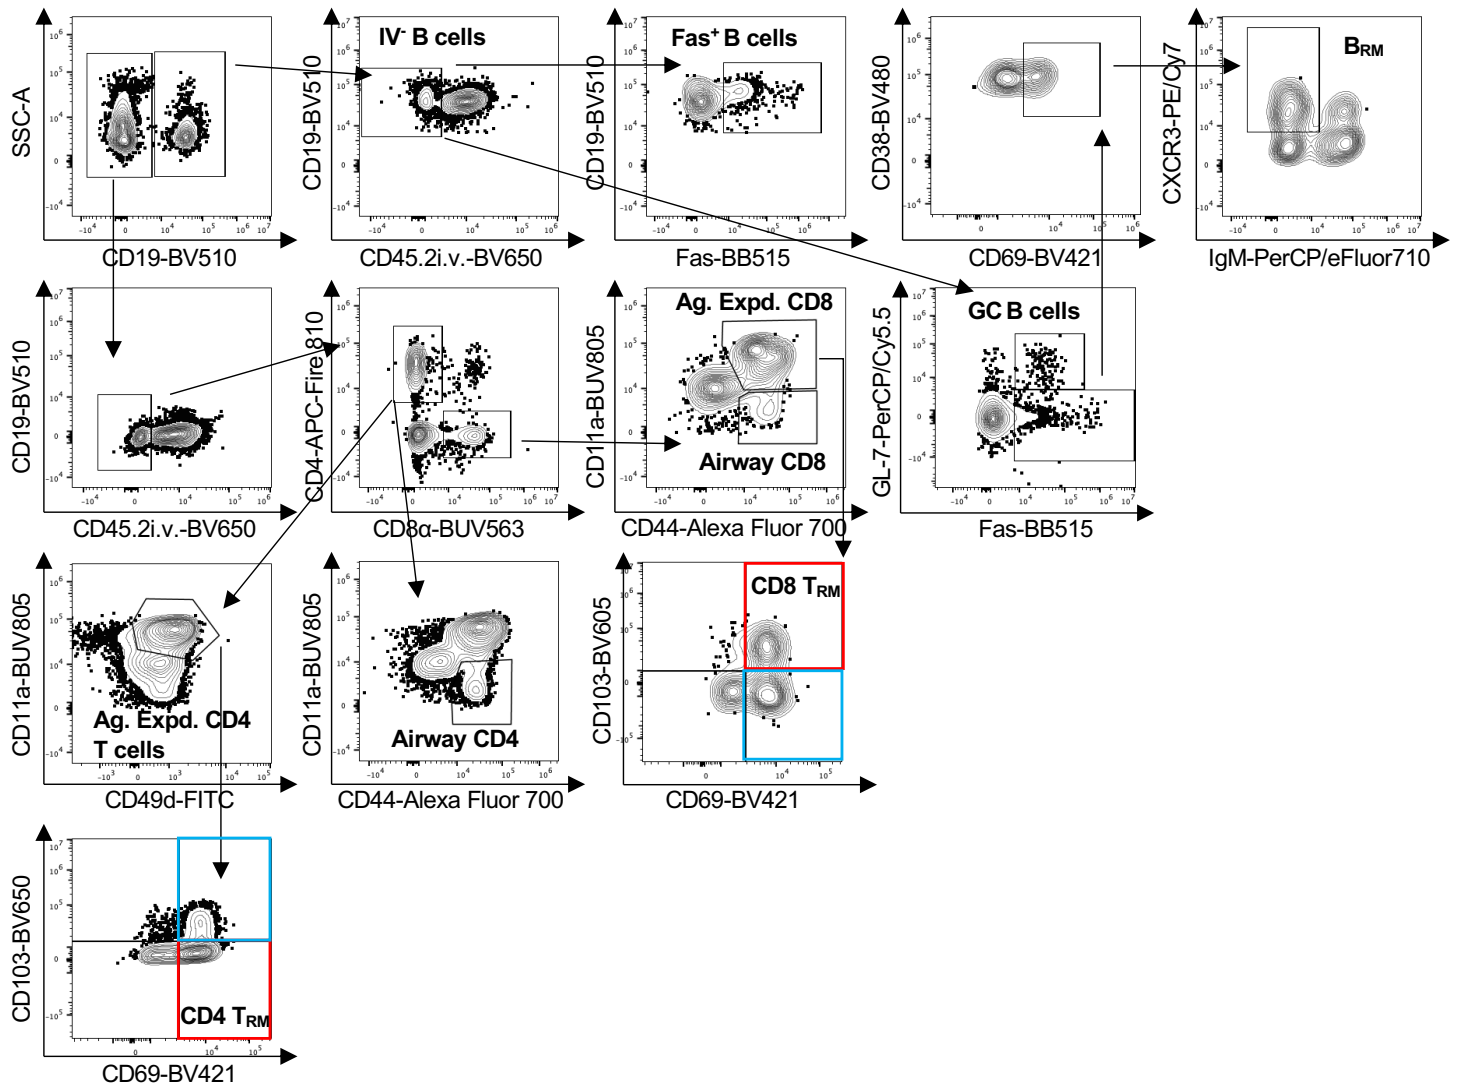

**Supplementary Fig. 2. Lymphocyte Gating Tree.** Lymphocyte Gating Tree. C57BL/6 mice were vaccinated i.n. with 500  $\mu$ g of H3-nanovax encapsulating CpG + either 1% each HA + NP, M1 + NA, or NA + NP or left unvaccinated (naïve). At 45- or 50- days post vaccination lungs and draining lymph nodes were harvested and stained for expression of markers of interest. B and T cells were segregated based on CD19, CD4, and CD8 $\alpha$  expression. B cells within the lung vs those in the circulation were further identified based on CD45.2i.v.Ab<sup>-</sup>. B cells within the lung were further subset into FAS<sup>+</sup> B cells (CD45.2i.v.Ab<sup>-</sup>CD19<sup>+</sup>Fas<sup>+</sup>) and Germinal Center (GC) B cells (CD45i.v.Ab<sup>-</sup>CD19<sup>+</sup> Fas<sup>+</sup>GL7<sup>+</sup>). Fas<sup>+</sup>GL7<sup>-</sup> B cells were further subset into resident memory B cells (B<sub>RM</sub>; CD45i.v.Ab<sup>-</sup>CD19<sup>+</sup> Fas<sup>+</sup>GL7<sup>-</sup>CD38<sup>+</sup>CD69<sup>+</sup>IgM<sup>-</sup>CXCR3<sup>+</sup>). T cell populations in CD19<sup>-</sup> cells were gated based on CD4 or CD8 $\alpha$  expression and then further subset into antigen-experienced populations based on CD11a, CD49d, CD44 expression (AgExp CD4; CD4<sup>+</sup>CD11a<sup>hi</sup>CD49d<sup>+</sup> and AgExp CD8; CD11a<sup>hi</sup>CD44<sup>+</sup>). Airway resident T cells were identified on the basis of CD11a expression (airway CD4/CD8 T cells; CD11a<sup>lo</sup>CD44<sup>+</sup>). Antigen-experienced lung-resident memory T<sub>RM</sub> populations of CD4 and CD8 T cells were determined on the basis of CD45.2i.v.Ab<sup>-</sup>, CD69 and CD103 expression.

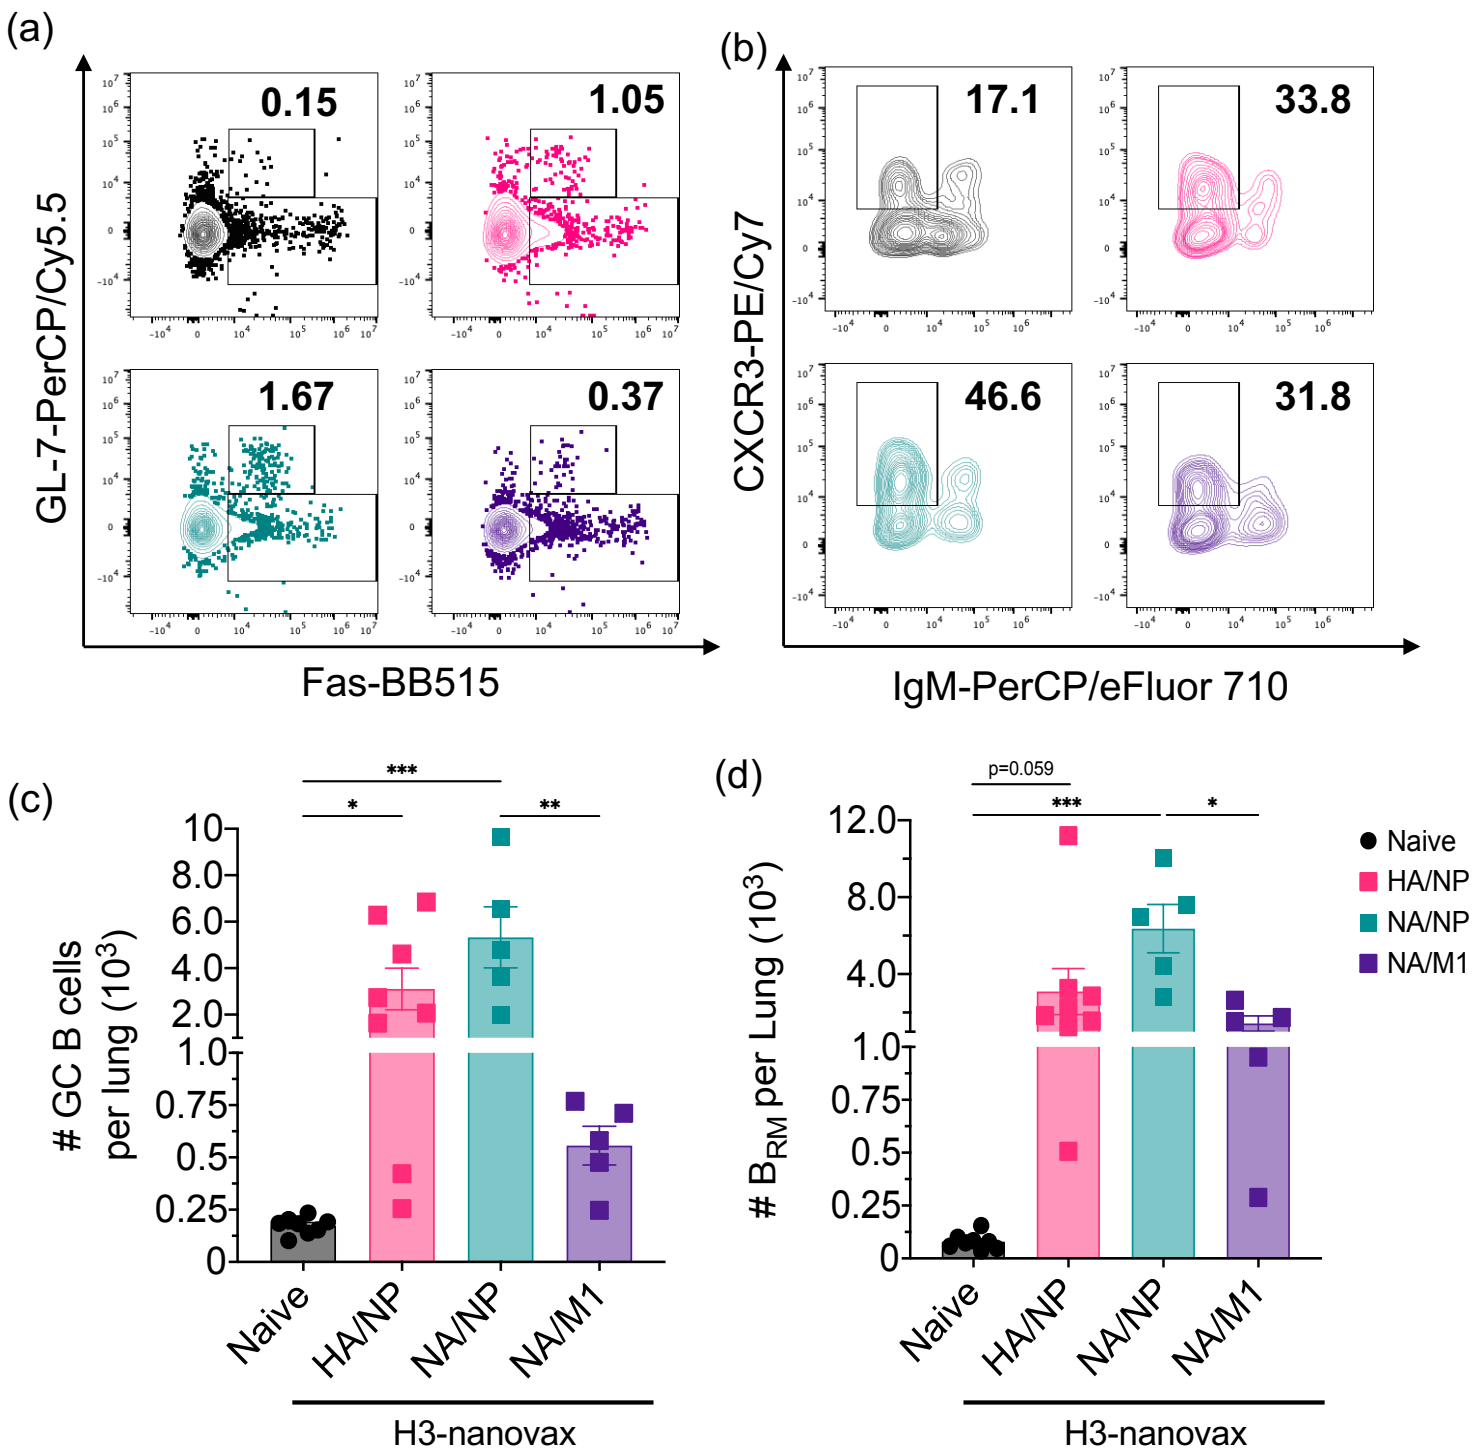

**Supplementary Fig. 3. Germinal Center B cells and B<sub>RM</sub> in the lungs following H3-nanovax. Supplemental Figure 2. Germinal Center B cells and B<sub>RM</sub> in the lungs following H3-nanovax.** C57BL/6 mice were vaccinated i.n. with 500  $\mu$ g of H3-nanovax (HA/NP; Pink), (NA/NP; Blue), (NAM/M1; Purple), or left unvaccinated (naïve). Representative flow plots (a, b) and enumeration (c, d) of lung resident germinal center (GC) B cells (CD45i.vAb-CD19<sup>+</sup> Fas<sup>+</sup>GL7<sup>+</sup>, shown are CD45i.v.Ab-CD19<sup>+</sup> gated cells) (a, c), and resident memory B cells (B<sub>RM</sub>) (CD45i.vAb-CD19<sup>+</sup> Fas<sup>+</sup>GL7-CD38<sup>+</sup>CD69<sup>+</sup>IgM-CXCR3<sup>+</sup>, shown are CD45i.vAb-CD19<sup>+</sup> Fas<sup>+</sup>GL7-CD38<sup>+</sup>CD69<sup>+</sup> cells) (b, d) at 45 or 50 days post vaccination. Error bars, mean  $\pm$  s.e.m. Data representative of one (NA/NP, NAM/M1: n= 5 mice/group) or two (Naïve, HA/NP: n= 4 mice/group) independent experiments. \* P < 0.05, \*\* P < 0.01 (One-way ANOVA with Tukey's multiple comparisons test).

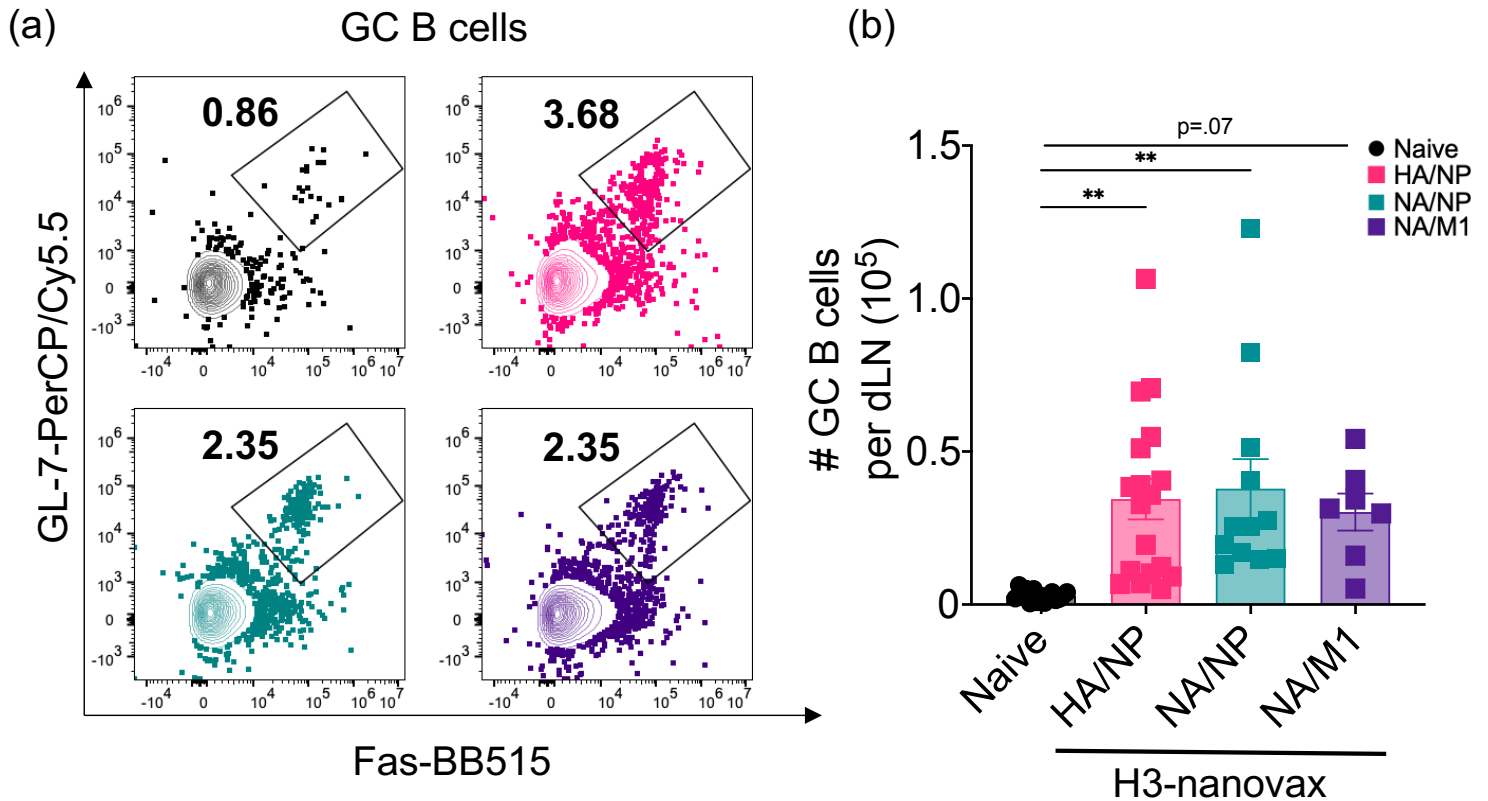

**Supplementary Fig. 4. H3-nanovax formulations induce lymph node-resident Germinal Center B cells responses.** C57BL/6 mice were vaccinated i.n. with 500  $\mu$ g of H3-nanovax (HA/NP; Pink), (NA/NP; Blue), (NA/M1; Purple), or left unvaccinated (naïve). Representative flow plots (a) and enumeration (b) of lymph node resident germinal center (GC) B cells (Fas<sup>+</sup>GL7<sup>+</sup>) at 45- or 50-days post vaccination. Shown are CD45i.vAb-CD19<sup>+</sup> gated cells. Error bars, mean  $\pm$  s.e.m. Data representative of two (NA/M1: n= 3-4 mice/group) or three (Naïve, HA/NP, and NA/NP: n= 4-5 mice/group) independent experiments. \* P< 0.05, \*\* P< 0.01 (One-way ANOVA with Tukey's multiple comparisons test).

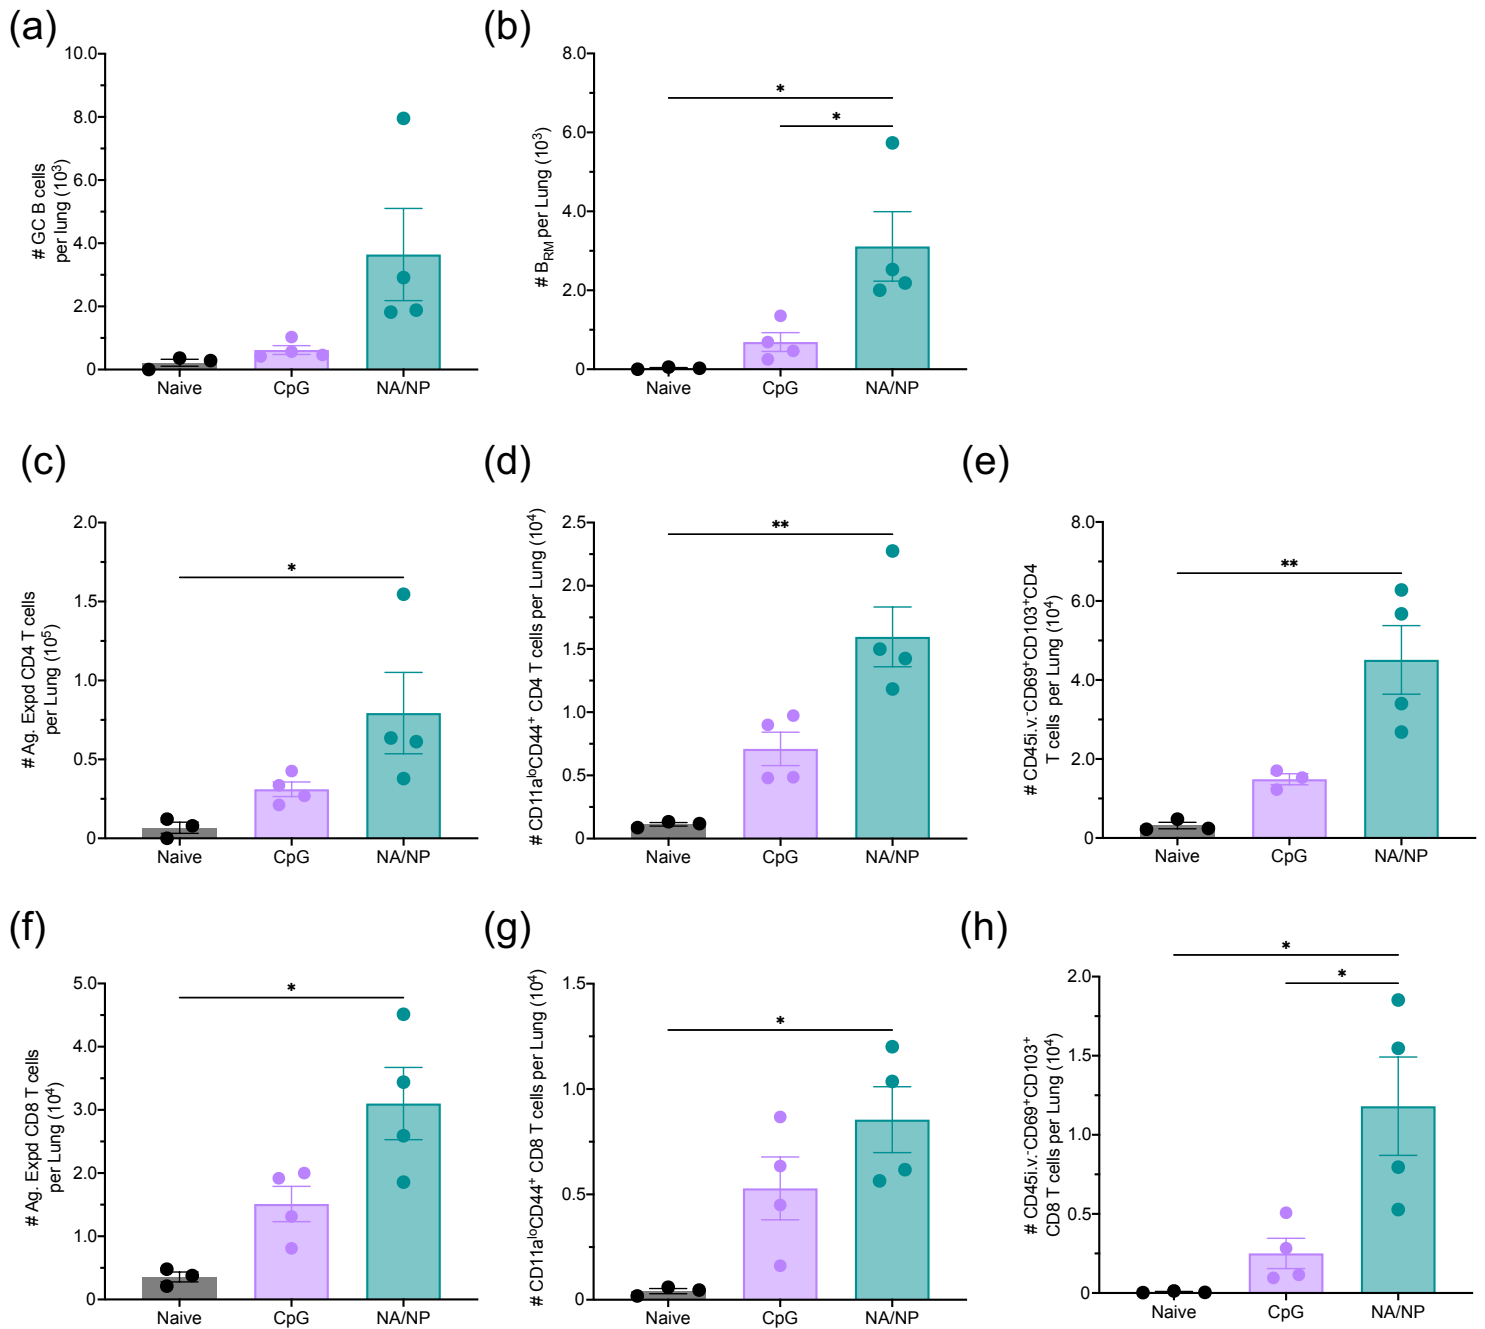

**Supplementary Fig. 5. CpG-nanovax does not induce significant immunity relative to unvaccinated mice.** C57BL/6 mice were vaccinated as described in Fig. 2. 32 days following prime vaccination, lungs were harvested and GC and  $B_{RM}$  (a, b) B cell responses were enumerated. Total numbers of antigen experienced lung (CD11a<sup>hi</sup>CD44<sup>+</sup>) (c, f), airway (CD11a<sup>lo</sup>CD44<sup>+</sup>) (d, g), and CD4 (CD69<sup>+</sup>CD103<sup>-</sup>, e) and CD8 (CD69<sup>+</sup>CD103<sup>+</sup>, h) Tm T cells were also enumerated. Error bars, mean  $\pm$  s.e.m. Data representative of one n= 3-4 mice/group) independent experiment. \* P< 0.05, (One-way ANOVA with Tukey's multiple comparisons test).

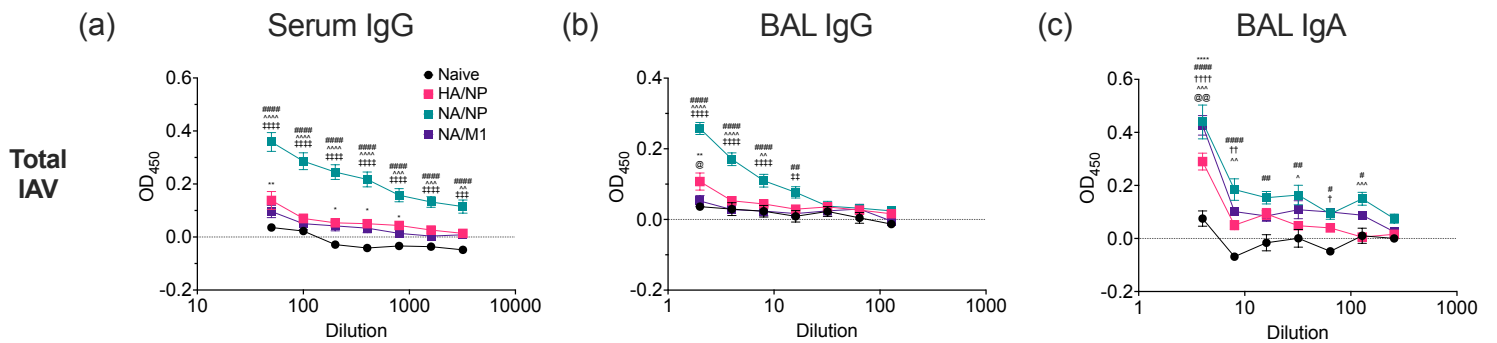

**Supplementary Fig. 6. H3-nanovax encapsulating IAV proteins induces payload targeted systemic and lung-local IAV-specific antibody responses.** C57BL/6 mice were vaccinated with H3-nanovax encapsulating CpG + either HA/NP (Pink), NA/NP (Blue), NA/M1 (Purple), or left unvaccinated (naïve). At 45 days post-vaccination, serum and BAL were collected and total IAV H3N2 A/Hong Kong/1/68 (i.e., virion specific) serum and BAL IgG (a, b) and BAL IgA (c) were quantified via ELISA. Error bars, mean  $\pm$  s.e.m. Data representative of two independent experiments with  $n = 4$  mice/group. (a-c) HA/NP vs. naïve: \*  $P < 0.05$ , \*\*  $P < 0.01$ , \*\*\*  $P < 0.001$ , \*\*\*\*  $P < 0.0001$ ; NA/NP vs. naïve: #  $P < 0.05$ , ##  $P < 0.01$ , ###  $P < 0.001$ , ####  $P < 0.0001$ ; NA/M1 vs. naïve: †  $P < 0.05$ , ††  $P < 0.01$ , †††  $P < 0.001$ , ††††  $P < 0.0001$ ; HA/NP vs. NA/M1: @  $P < 0.05$ , @@  $P < 0.01$ , @@@  $P < 0.001$ , @@@@  $P < 0.0001$ , NA/NP vs. NA/M1: ‡  $P < 0.05$ , ‡‡  $P < 0.01$ , ‡‡‡  $P < 0.001$ , ‡‡‡‡  $P < 0.0001$ , (Two-way ANOVA with Tukey's multiple comparison test). (g, h) \*\*\*\*  $P < 0.0001$  (One-way ANOVA with Tukey's multiple comparisons test).

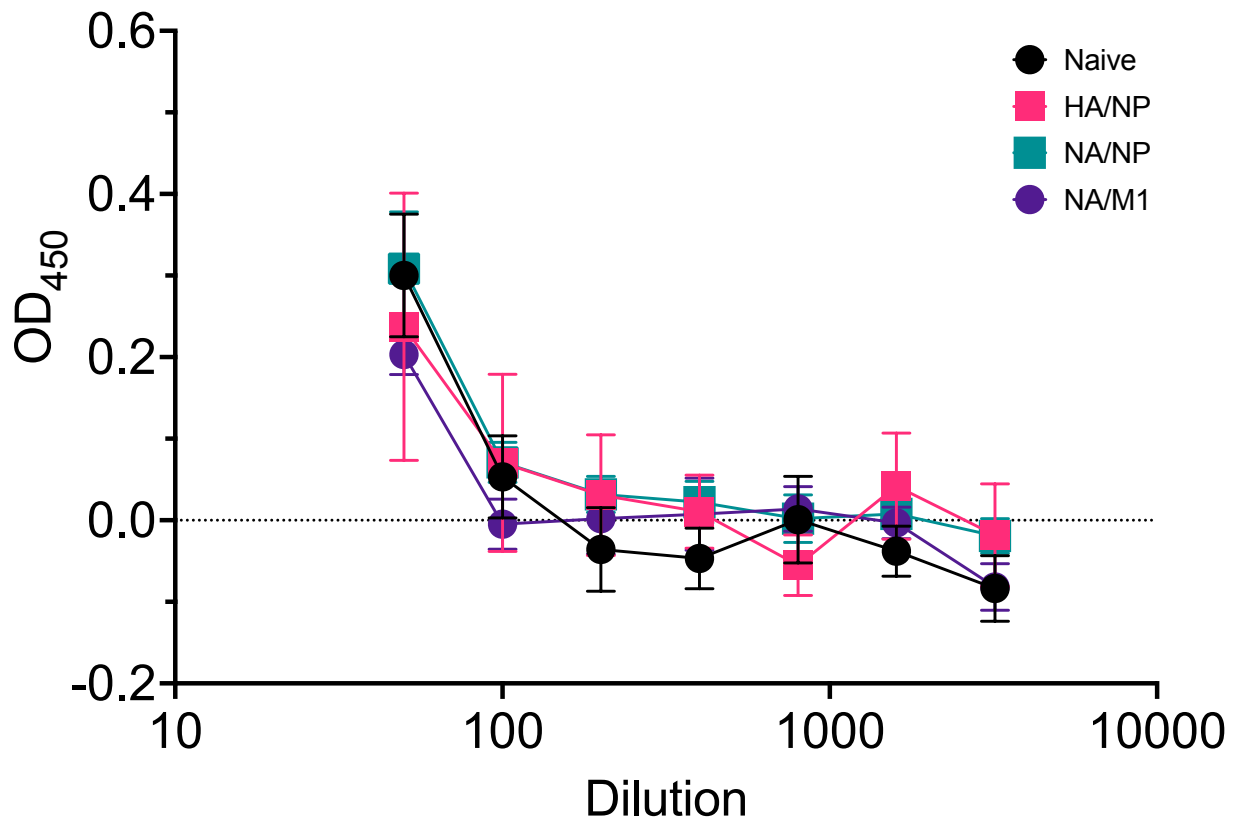

**Supplementary Fig. 7. IAV-nanovax induced antibody is specific to the viral protein component rather than the His-tag.** C57BL/6 mice were vaccinated as described in Fig. 2. At 45- or 50- days post vaccination, serum and BAL were collected and ELISA and total anti-His-SARS-CoV-2 S1 subunit specific IgG was quantified to determine whether His-tags on the proteins utilized in H3-nanovax formulations elicited His-reactive antibody. Error bars, mean  $\pm$  s.e.m. Dotted line = 0. Data representative of two independent experiments with  $n = 4$  mice/group. Two-way ANOVA with Tukey's multiple comparison test



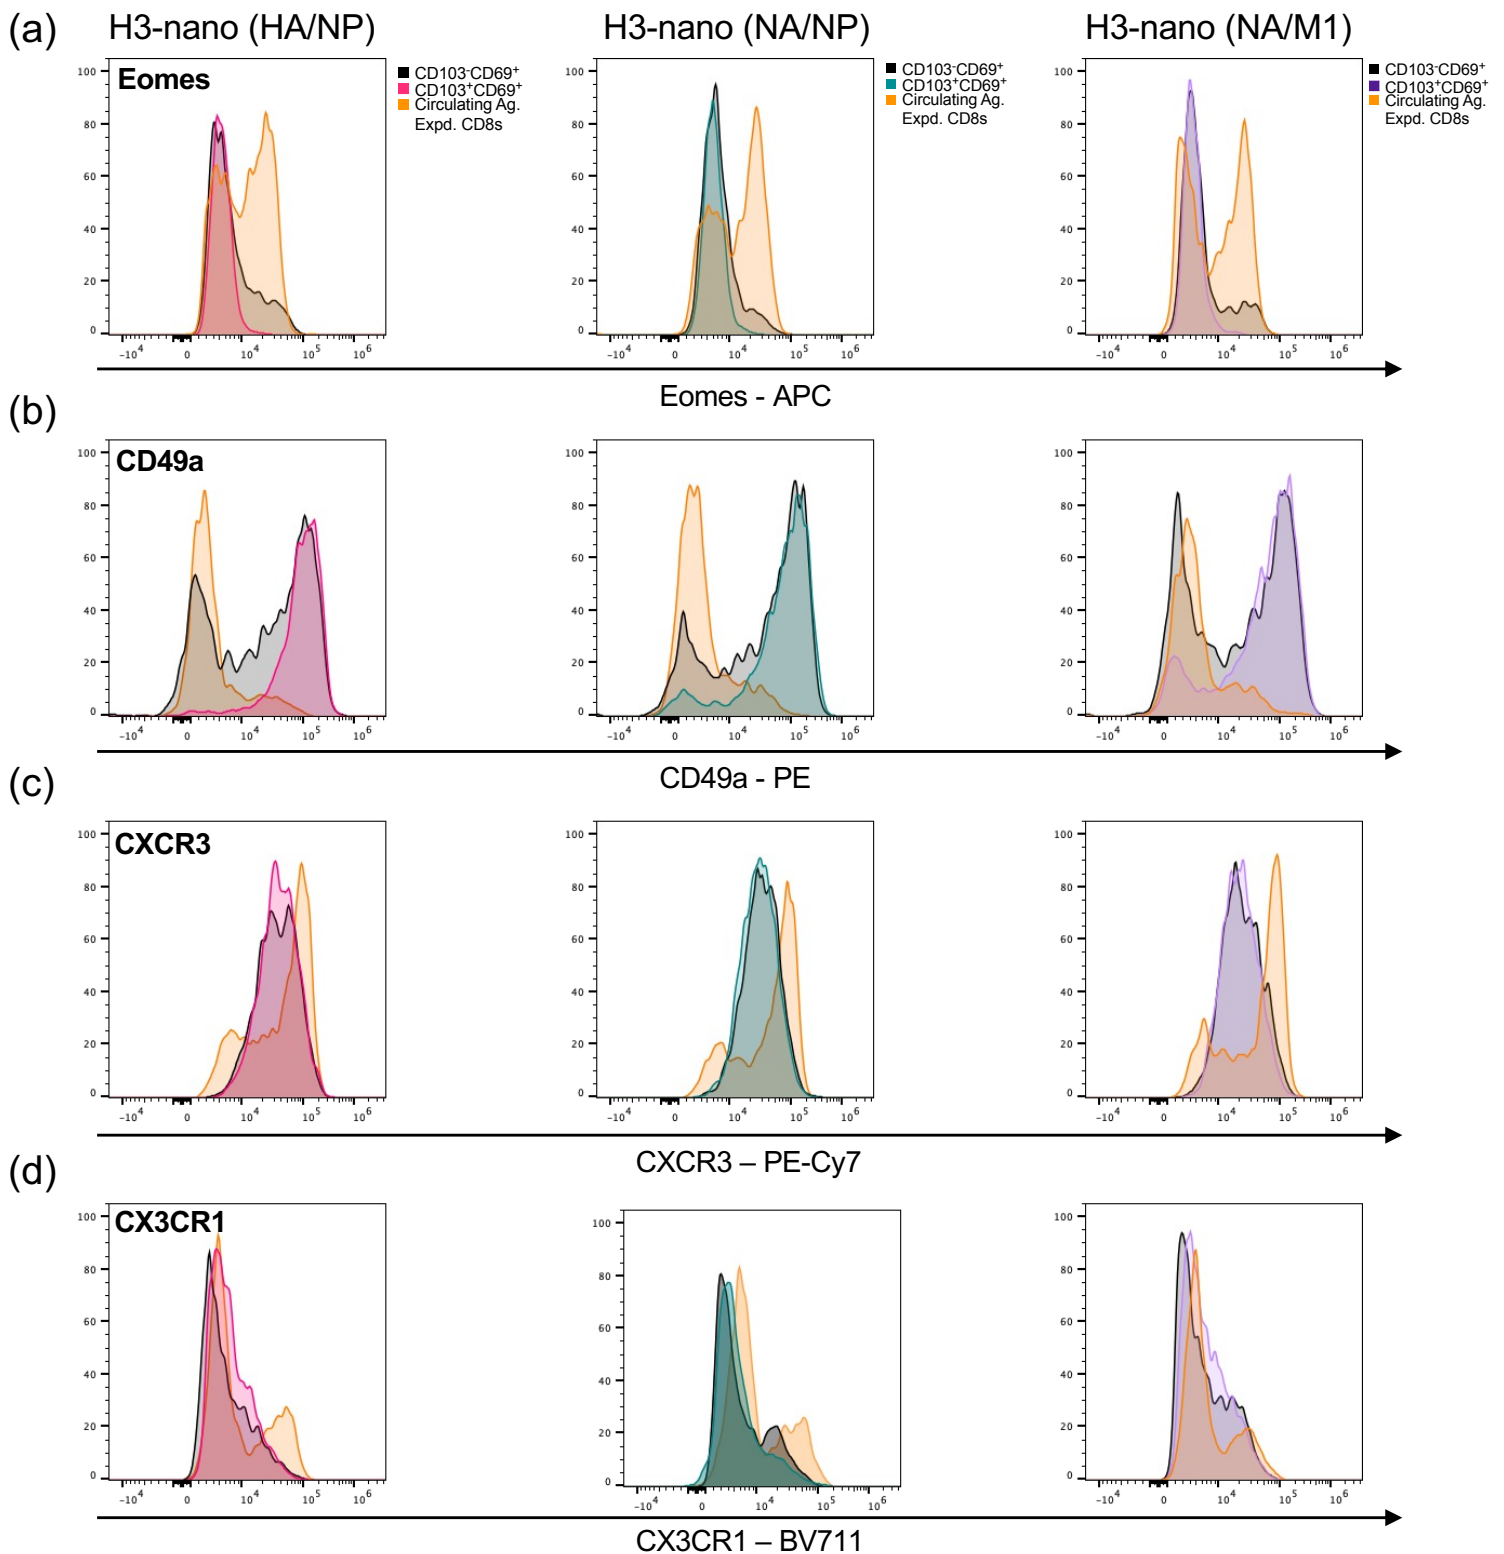

**Supplementary Fig. 8. H3-nanovax formulation generated antigen-experienced CD103<sup>+</sup>CD69<sup>+</sup> CD8 T cells exhibit a uniform T<sub>RM</sub> phenotype relative to CD103<sup>-</sup> and circulating counterparts.** C57BL/6 mice were vaccinated as described in Figure 2. 32 days following prime vaccination, lungs were harvested, and the phenotype of vaccine generated CD103<sup>+</sup>CD69<sup>+</sup> (HA/NP: Pink, NA/NP: Blue, NA/M1: Purple) and CD103<sup>-</sup>CD69<sup>+</sup> (Gray) antigen-experienced CD8 T cells in the lung interstitium was determined using established T<sub>RM</sub> markers Eomesodermin (Eomes) (a), CD49a (b), CXCR3 (c), and CX3CR1 (d). Circulating antigen-experienced CD8 T cells (i.e. CD45.2i.v.Ab<sup>+</sup>: Orange) served as a control. Data representative of one (n= 4-5 mice/group) independent experiment.



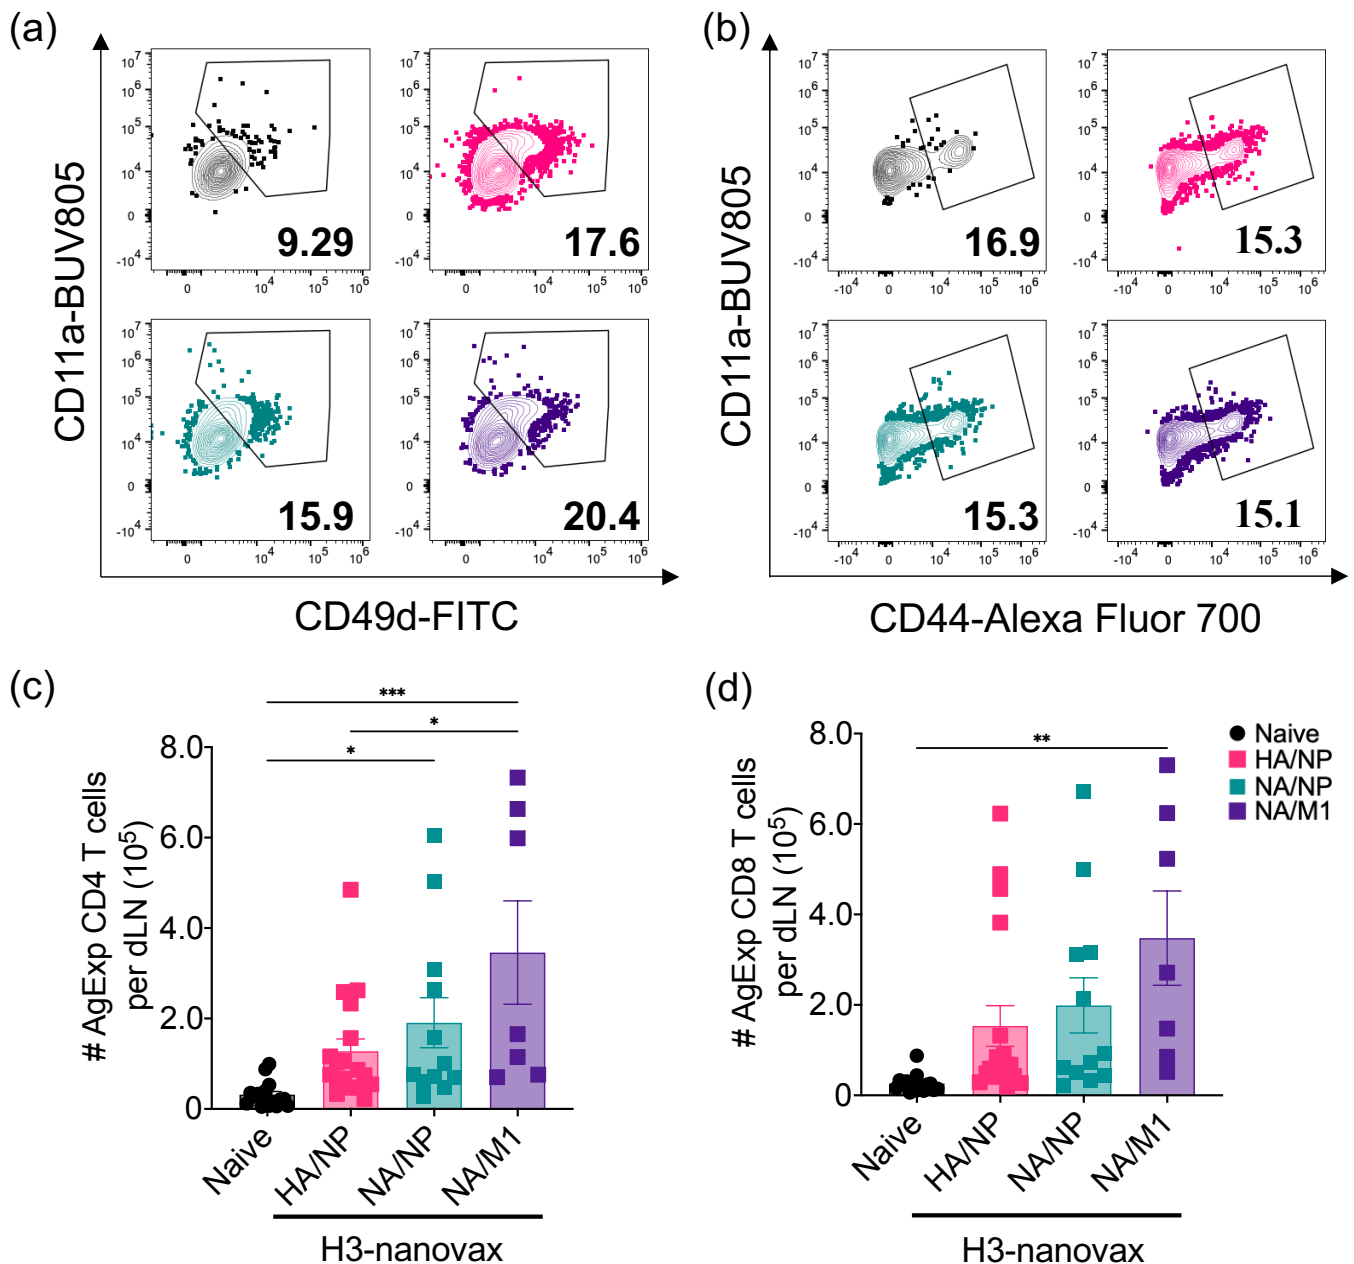

**Supplementary Fig. 9. H3-nanovax formulations induce lymph node-resident T cell responses.** C57BL/6 mice were vaccinated (H3-nanovax (HA/NP; Pink), (NA/NP; Blue), (NA/M1; Purple), or left unvaccinated (naïve)) as described in Fig. 2. Representative flow plots (a, b) and enumeration (CD4: c; CD8: d) of antigen-experienced CD4 (c, CD11a<sup>hi</sup>CD49d<sup>+</sup>) and CD8 (b, CD11a<sup>hi</sup>CD44<sup>+</sup>) T cells enumerated at 45- or 50- days post vaccination. Shown are CD4<sup>+</sup>CD11a<sup>hi</sup>CD49d<sup>+</sup> (a, c) and CD8 $\alpha$ <sup>+</sup>CD11a<sup>hi</sup>CD44<sup>+</sup> (b, d) gated cells. Error bars, mean  $\pm$  s.e.m. Data representative of two (M1/NA: n= 3-4 mice/group) or three (Naïve, HA/NP, and NA/NP: n= 4-5 mice/group) independent experiments. \* P < 0.05, \*\* P < 0.01, \*\*\* P < 0.001 (One-way ANOVA with Tukey's multiple comparisons test).

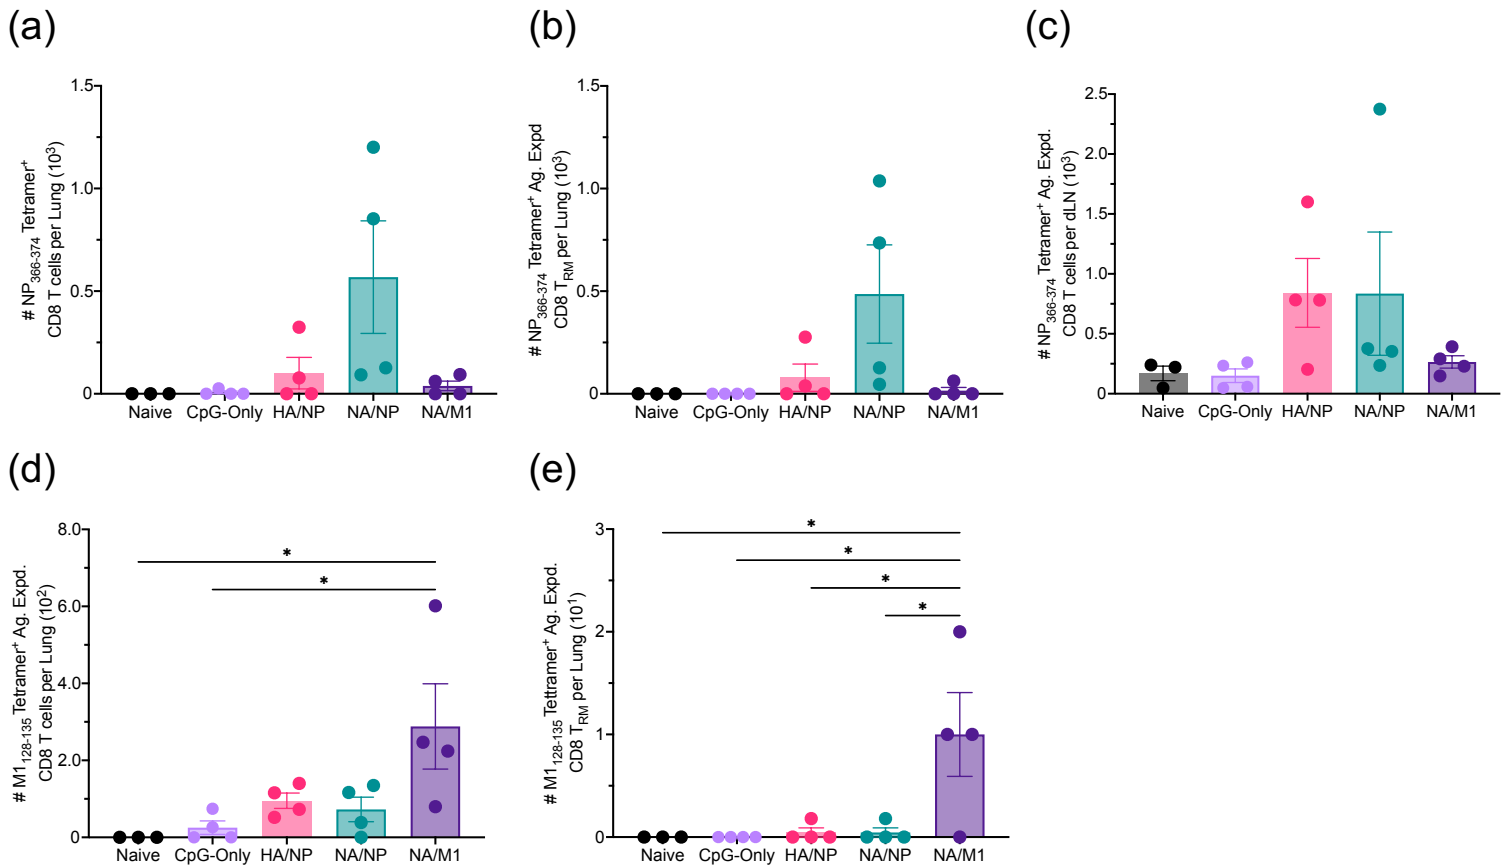

**Supplementary Fig. 10. H3-nanovax formulations generate vaccine specific CD8 T cell responses.** C57BL/6 mice were vaccinated (CpG only-nanovax (light purple), H3-nanovax (HA/NP; Pink), (NA/NP; Blue), (NA/M1; Purple), or left unvaccinated (naïve)) as described in Fig. 2. Lung resident antigen-experienced CD8 (CD45i.vAb-CD8 $\alpha$ <sup>+</sup>CD44<sup>+</sup>) T cells specific for NP<sub>366-374</sub> and M1<sub>128-135</sub> derived from IAV A/Hong Kong/1/68 and A/Aichi/2/68 respectively were enumerated (a, b, d, e). Enumeration of dLN antigen experienced (CD11a<sup>+</sup>CD44<sup>+</sup>) CD8 T cells specific for NP<sub>366-374</sub> (c). Error bars, mean  $\pm$  s.e.m. Data representative of one n= 3-4 mice/group) independent experiment. \* P < 0.05, (One-way ANOVA with Tukey's multiple comparisons test).
